# Supplementary material
Source: publisher figshare collection journal article supplement (https://acs.figshare.com/ndownloader/files/3866050)
Supplement: Supplementary file 1 [file 3866050]

## Admittance Detector for High Impedance Systems Design and Applications

Min Zhang<sup>†</sup>, Brian N. Stamos<sup>†</sup>, Purnendu K. Dasgupta<sup>†\*</sup>

<sup>†</sup>) <#> ["](#) [u](#) [y](#) [u](#) ["](#) ["](#)  
u [y](#) [o](#)

## SUPPORTING INFORMATION

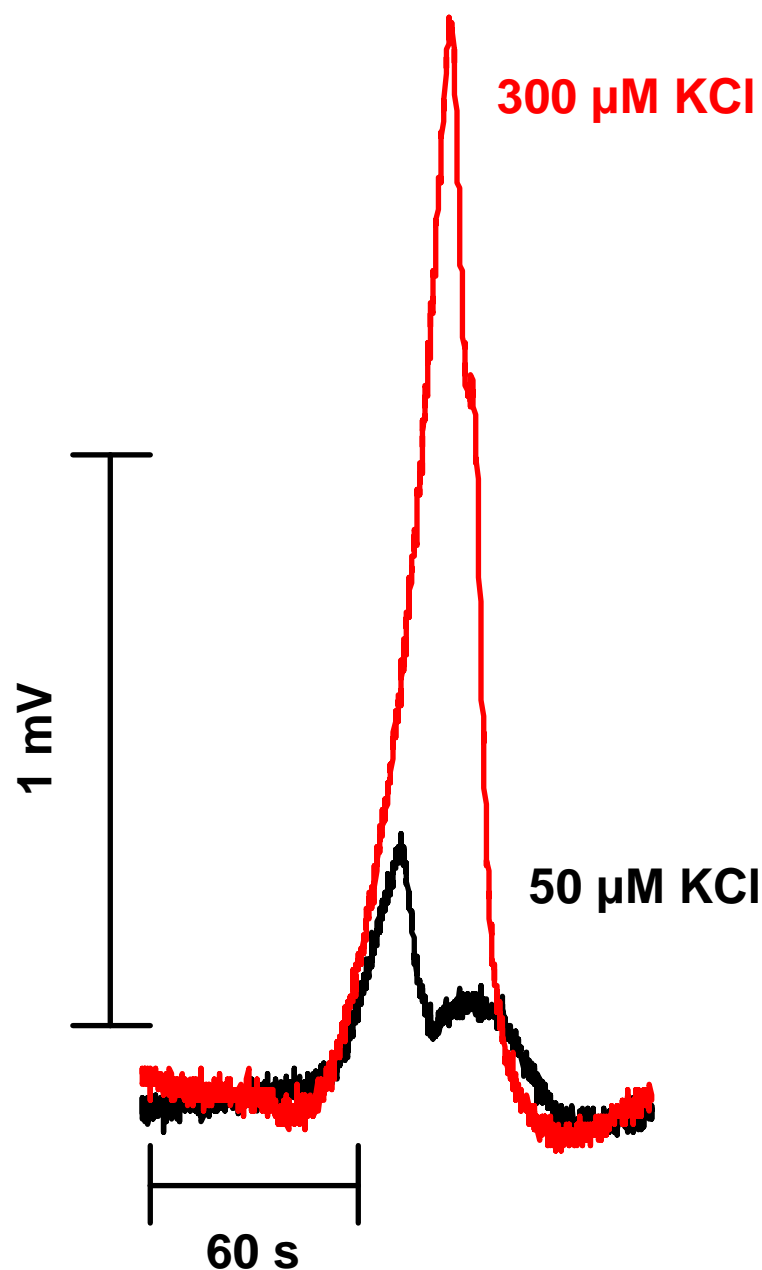

**Figure S1.** During several initial injections of KCl into a water carrier flowing through the capillary ( $r = 1 \mu\text{m}$ ,  $r_o = 75 \mu\text{m}$ , see Figure 3 for other conditions), a split peak was produced. This gradually disappeared. We interpret this as the wall is initially in the  $\text{H}^+$ -form.  $\text{K}^+$  in part is exchanged for  $\text{H}^+$  and the two elute separately ( $\text{HCl}$ , then  $\text{KOH}+\text{KCl}$ ) leading to split peaks. When the wall is fully converted to the  $\text{K}^+$ -form, “normal” peaks appear.
